# Supplementary material for: Internet-Based Cognitive Behavioral Therapy to Reduce Suicidal Ideation: A Systematic Review and Meta-analysis
Source: PubMed Central journal article supplement (PMC7189224; doi:10.1001/jamanetworkopen.2020.3933), 2020-04-28
Supplement: jamanetwopen-3-e203933-s001.pdf [file jamanetwopen-3-e203933-s001.pdf]

## Supplementary Online Content

Büscher R, Torok M, Terhorst Y, Sander L. Internet-based cognitive behavioral therapy to reduce suicidal ideation: a systematic review and meta-analysis. *JAMA Netw Open*. 2020;3(4):e203933. doi:10.1001/jamanetworkopen.2020.3933

**eMethods.** Amendments to the Study Protocol

**eTable 1.** Between-Groups Effect Sizes of Secondary Outcomes

**eTable 2.** GRADE Ratings for Suicidal Ideation

**eResults.** Results of Ongoing Trials

**eReferences.**

This supplementary material has been provided by the authors to give readers additional information about their work.

## **eMethods. Amendments to the Study Protocol**

### Amendment 1:

We did not assess publication bias by using a funnel plot.

Reason: The number of studies was considered to be too low.

### Amendment 2:

We did not conduct the pre-planned subgroup analyses for guidance and age of target group. Instead, we conducted two sensitivity analyses by excluding guided interventions and interventions for youth.

Reason: The total number of participants included in the subgroups of guided and youth interventions was considered to be too low (n=109 and n=130, respectively).

**eTable 1. Between-Groups Effect Sizes of Secondary Outcomes**

| First author (year)                                 | N   | Hopelessness                  |                      | Depressiveness         |                      | Anxiety |                      |
|-----------------------------------------------------|-----|-------------------------------|----------------------|------------------------|----------------------|---------|----------------------|
|                                                     |     | Measure                       | d [95% CI]           | Measure                | d [95% CI]           | Measure | d [95% CI]           |
| van Spijker (2014)<br>Post (6 weeks)                | 236 | BHS                           | -0.28 [-0.54; -0.03] | BDI-II                 | -0.22 [-0.48; 0.03]  | HADS-A  | -0.14 [-0.40; 0.11]  |
| Hill (2016) <sup>a</sup><br>Post (2 weeks)          | 80  | n.a.                          | n.a.                 | RADS-2<br>(short form) | -0.29 [-0.73; 0.15]  | n.a.    | n.a.                 |
|                                                     | 80  |                               | n.a.                 |                        | -0.42 [-0.86; 0.03]  |         | n.a.                 |
| Hetrick (2017) <sup>a,b</sup><br>Post (2 weeks)     | 39  | BHS                           | -0.02 [-0.65; 0.61]  | RADS-2                 | -0.20 [-0.84; 0.43]  | MASC    | -0.35 [-0.98; 0.29]  |
|                                                     | 30  |                               | -0.11 [-0.83; 0.61]  |                        | -0.45 [-1.18; 0.28]  |         | -0.31 [-1.03; 0.42]  |
| van Spijker (2018) <sup>a,c</sup><br>Post (6 weeks) | 418 | Burns Hope-<br>lessness Scale | 0.17 [-0.02; 0.37]   | CES-D                  | -0.07 [-0.26; 0.13]  | GAD-7   | 0.06 [-0.13; 0.25]   |
|                                                     | 418 |                               | 0.03 [-0.16; 0.22]   |                        | 0.08 [-0.11; 0.27]   |         | 0.23 [0.04; 0.42]    |
|                                                     | 418 |                               | -0.08 [-0.28; 0.11]  |                        | -0.20 [-0.39; 0.00]  |         | -0.33 [-0.52; -0.14] |
| de Jaegere (2019)<br>Post (6 weeks)                 | 724 | BHS                           | -0.46 [-0.61; -0.31] | BDI-II                 | -0.38 [-0.52; -0.23] | HADS-A  | -0.37 [-0.52; -0.22] |
|                                                     | 724 |                               | -0.53 [-0.68; -0.39] |                        | -0.44 [-0.59; -0.29] |         | -0.38 [-0.52; -0.23] |

Note: Negative effect sizes indicate reductions in symptom severity

<sup>a</sup> Effects calculated based on reported means, standard deviations and number of participants

<sup>b</sup> No ITT analysis

<sup>c</sup> Effect sizes of mean changes from baseline were calculated due to baseline differences in suicidal ideation

n.a.: Outcome was not assessed

BHS: Beck Hopelessness Scale

BDI-II: Beck Depression Inventory

CES-D: Centre for Epidemiological Studies Depression Scale

RADS-2: Reynolds Adolescent Depression Scale-2

HADS-A: Hospital Anxiety and Depression Scale

## eTable 2. GRADE Ratings for Suicidal Ideation

GRADE rating for n = 6 studies reporting self-rated severity of suicidal ideation at post-intervention

| GRADE criteria   | Rating                                      | Reasons for down- or upgrading                                                                                                                                                                                                        | Quality of the evidence |
|------------------|---------------------------------------------|---------------------------------------------------------------------------------------------------------------------------------------------------------------------------------------------------------------------------------------|-------------------------|
| Study design     | RCT: high quality                           |                                                                                                                                                                                                                                       |                         |
| Risk of Bias     | Serious limitations (-1)                    | Participants not blinded. 3 out of 6 studies with critical dropout-rates (>20%; 2 studies > 40%). Waitlist controls might have overestimated effect size                                                                              |                         |
| Inconsistency    | No serious limitations                      | Small effect size (SMD = -0.29), $I^2 = 0\%$ . Results in the same direction                                                                                                                                                          |                         |
| Indirectness     | No serious limitations                      | Population limited to individuals with suicidal ideation.                                                                                                                                                                             | ⊕⊕⊕⊖                    |
| Imprecision      | No serious limitations                      | More than 1500 participants in total; pooled effect size and CIs all consistent with small effects; absence of any outlier suggests low imprecision, despite small sample sizes and the fact that studies generally were underpowered |                         |
| Publication Bias | Undetected (insufficient number of studies) | No evidence in trial register search. Significant, non-significant and large trials reported.                                                                                                                                         |                         |

Note. ⊕⊕⊕⊕ = high, ⊕⊕⊕⊖ = moderate, ⊕⊕⊖⊖ = low, ⊕⊖⊖⊖ = very low. Included studies: Hetrick et al., 2017; Hill & Pettit, 2016; Jaegere et al., 2019; van Spijker et al., 2018; van Spijker et al., 2014; Wilks et al., 2018.

GRADE rating for n = 4 studies reporting suicidal ideation at follow-up (up to 6 weeks after post)

| GRADE criteria   | Rating                                      | Reasons for down- or upgrading                                                                                                                                                                    | Quality of the evidence |
|------------------|---------------------------------------------|---------------------------------------------------------------------------------------------------------------------------------------------------------------------------------------------------|-------------------------|
| Study design     | RCT: high quality                           |                                                                                                                                                                                                   |                         |
| Risk of Bias     | Serious limitations (-1)                    | Participants not blinded. 3 out of 4 studies with critical dropout-rates (>20%; 2 studies >60%). Waitlist controls might have overestimated effect size                                           |                         |
| Inconsistency    | Serious limitations (-1)                    | Moderate statistical heterogeneity ( $I^2 = 36\%$ ); results are not all in the same direction (Hill favors control); varying assessment times (6 – 26 weeks after post)                          |                         |
| Indirectness     | No serious limitations                      | Population limited to individuals with suicidal ideation                                                                                                                                          | ⊕⊖⊖⊖                    |
| Imprecision      | Serious limitations (-1)                    | More than 1200 participants in total (ITT), but only n=4 studies provided follow-up data; very high dropout (<500 participants raw); 95% CI (-0.34, -0.02) indicates a high degree of uncertainty |                         |
| Publication Bias | Undetected (insufficient number of studies) | No evidence in trial register search. Significant, non-significant and large trials reported.                                                                                                     |                         |

Note. ⊕⊕⊕⊕ = high, ⊕⊕⊕⊖ = moderate, ⊕⊕⊖⊖ = low, ⊕⊖⊖⊖ = very low. Included studies: de Jaegere et al., 2019; van Spijker et al., 2018; Hill & Pettit, 2016; Hetrick et al., 2017.

## eResults. Review of Ongoing Trials

We identified two large population-based trials that focus on the effectiveness of internet-based interventions on suicide attempt and suicide. This included a web- and mobile-based intervention (NCT03565562<sup>1</sup>) and an internet-based skills training based on dialectical behavioral therapy (NCT02326883<sup>2</sup>), with 100,000 and 19,500 expected participants, respectively. The remaining five studies were planned on a smaller scale and mainly focused on the effectiveness of digital interventions on suicidal ideation. Two ongoing trials planned to examine the effectiveness of the intervention by van Spijker et al.,<sup>3</sup> adapted for Turkish migrants,<sup>4</sup> and translated to Danish (NCT02872610<sup>5</sup>). One trial planned to use a web- and mobile-based platform providing information, self-monitoring, counselling and a virtual community for school students in Chile (NCT03514004<sup>6</sup>). Finally, we identified one trial examining a computerized intervention for active military personnel (NCT03571750), and one trial with two internet-based programs for the prevention of suicidal ideation in medical students (NCT03949556).

## eReferences.

1. Coralie G, Kathleen T, Marie-Amelie V, Anais LJ, Hazo JB, Karine C. Printemps project: e-health intervention for suicide prevention and mental health promotion in the French general population. *Eur psychiatry*. 2018;48:S222-S223. doi:10.1016/j.eurpsy.2017.12.016
2. Simon GE, Beck A, Rossom R, et al. Population-based outreach versus care as usual to prevent suicide attempt: study protocol for a randomized controlled trial. *Trials*. 2016;17(1):452. doi:10.1186/s13063-016-1566-z
3. van Spijker BAJ, van Straten A, Kerkhof AJFM. The effectiveness of a web-based self-help intervention to reduce suicidal thoughts: a randomized controlled trial. *Trials*. 2010;11:25. doi:10.1186/1745-6215-11-25
4. Eylem O, van Straten A, Bhui K, Kerkhof AJFM. Protocol: Reducing suicidal ideation among Turkish migrants in the Netherlands and in the UK: effectiveness of an online intervention. *Int Rev Psychiatry*. 2015;27(1):72-81. doi:10.3109/09540261.2014.996121
5. Mühlmann C, Madsen T, Hjorthøj C, Kerkhof A, Nordentoft M, Erlangsen A. The Self-help Online against Suicidal thoughts (SOS) trial: study protocol for a randomized controlled trial. *Trials*. 2017;18(1):45. doi:10.1186/s13063-017-1794-x
6. Mascayano F, Schilling S, Tapia E, et al. Using information and communication technologies to prevent suicide among secondary school students in two regions of Chile: a randomized controlled trial. *Front psychiatry*. 2018;9(236):1-9. doi:10.3389/fpsy.2018.00236
